1  
2 **Production of Hyaluronan by the Trophectoderm is a Prerequisite for Mouse Blastocyst Attachment**

3  
4  
5 **Ron Hadas<sup>1</sup>, Eran Gershon<sup>2</sup>, Aviad Cohen<sup>1&3</sup>, Michal Elbaz<sup>2</sup>, Shifra Ben-Dor<sup>4</sup>, Fortune Kohen<sup>1</sup>, Nava  
6 Dekel<sup>1</sup> and Michal Neeman<sup>1</sup>**

7 <sup>1</sup> Department of Biological Regulation, Weizmann Institute, Rehovot, Israel

8 <sup>2</sup> Agricultural Research Organization, Volcani Center, Israel

9 <sup>3</sup> Department of Gynecology, Tel Aviv Sourasky Medical Center, Affiliated to the Sackler School of Medicine,  
10 Tel Aviv University, Israel

11 <sup>4</sup> Life Sciences Core Facilities, Weizmann Institute, Rehovot, Israel  
12

13 Embryo implantation requires execution of highly synchronized processes at the fetomaternal interface, initiated  
14 by blastocyst attachment to the endometrial epithelium. Hyaluronan is a major ECM component known to regulate  
15 adhesion-associated biological processes in various physiological settings. We hypothesized that hyaluronan may  
16 facilitate blastocyst attachment. In order to test our hypothesis, we characterized the blastocyst expression of  
17 hyaluronan synthesizing and degrading enzymes, as well as the expression of hyaluronan receptors during  
18 attachment. The functional impact of hyaluronan was challenged by the use of mouse transgenic blastocysts, in  
19 which genes encoding for hyaluronan synthesizing enzymes were deleted using lentiviral incorporation of Cas-9  
20 endonuclease alongside specific short-guide RNAs into the embryonic trophectoderm. Embryos with transgenic  
21 trophectoderm were tested for their attachment *in vitro*, or assessed for implantation *in vivo*, upon transfer to  
22 foster dams. Deletion of the trophectoderm hyaluronan biosynthesis significantly reduced the number of  
23 blastocysts attached to human uterine epithelium cells *in vitro*. Reduced attachment was also observed *in vivo*, in  
24 pregnant mice carrying blastocysts with hyaluronan-depleted trophectoderm. In agreement, trophectoderm  
25 expression of osteopontin, was downregulated upon depletion of hyaluronan. MRI measurements revealed a  
26 decrease in uterine blood vessels permeability. Uterine expression of VEGF-A, PTGS-2 and uterine osteopontin,  
27 which constitute the immediate response to blastocyst attachment was also reduced. Furthermore, impaired  
28 implantation, associated with a decrease in hyaluronan synthesis in the mural trophectoderm, obtained upon  
29 tamoxifen treatment, has been recovered by LIF administration. These results demonstrate that estrogen-regulated  
30 hyaluronan-synthesis in the trophectoderm is indispensable for mouse blastocysts attachment to the uterine  
31 epithelium.  
32

## 33 Introduction

34 Implantation, during which the embryo attaches to and invades the maternal endometrium <sup>1</sup> is essential for  
35 successful pregnancy. In humans, natural conception per cycle is poor (~30%), and implantation defects were  
36 implicated in 75% of failed pregnancies <sup>2,3</sup>. Implantation is initiated by blastocyst apposition, which in mice, takes  
37 place on the fourth day of pregnancy (E4.0), followed by the attachment of embryonic mural trophoblast cells  
38 to the uterine luminal epithelium, and the subsequent invasion of the uterine epithelium into the implantation  
39 crypt toward the anti-mesometrial pole <sup>4</sup>. These physiological events require both, a receptive uterus as well as a  
40 high quality blastocyst <sup>5</sup>. Ovarian-secreted estrogen directly regulates blastocyst activation, in a temporally  
41 synchronized manner, preventing its dormancy <sup>6</sup>. The activated blastocyst attaches to the uterine epithelium,  
42 stimulating in response, a local up-regulation of the pro-angiogenic factor, VEGF-A. A resulting increased  
43 endometrial vascular permeability in the implantation chamber has been monitored *in vivo* by dynamic contrast-  
44 enhanced (DCE) MRI, using a high-molecular weight contrast agent <sup>3,7,8</sup>. Attachment and invasion are  
45 immediately followed by stromal cell decidualization, forming the primary decidual zone, consisting of PTGS-2  
46 positive decidualized cells <sup>9</sup>. Blastocyst attachment to the uterine anti-mesometrial epithelium is enabled by  
47 immediate cell surface interactions, mediated by extra-cellular matrix (ECM) carbohydrate contacts <sup>2</sup>.

48 Hyaluronan is an anionic high-molecular weight polysaccharide, with an average molecular mass of 10<sup>6</sup>–10<sup>7</sup> Da  
49 <sup>10,11</sup>. Hyaluronan is produced in the inner side of the cell membrane by three hyaluronan synthases, HAS-1, HAS-  
50 2 and HAS-3. The production of hyaluronan by these membrane-bound enzymes is followed by the extrusion of  
51 its intact polysaccharide form, which is either retained in the cell surface or released <sup>12</sup>. Hyaluronan can be  
52 subjected to extensive turnover by specific degrading enzymes known as hyaluronidases, the activity of which  
53 generates small oligosaccharides. The intact hyaluronan together with its shorter degradation products have been  
54 shown to directly regulate cell behavior via binding to specific hyaluronan receptors, such as CD44, RHAMM,  
55 LYVE-1 and TLR-4 <sup>13-15</sup>.

56 The goal of this study was to determine the role of hyaluronan as a mediator of blastocyst attachment in mice.  
57 For that purpose, we generated blastocysts, in which the hyaluronan synthesizing enzymes were deleted using a  
58 Cas-9 endonuclease system (CRISPR). The use of lenti-viral vectors allowed exclusive targeting of these genetic  
59 modifications to the trophoblast with no effect on the inner-cell mass (ICM) <sup>16</sup>. Disruption of trophoblast  
60 hyaluronan synthesis resulted in impaired attachment accompanied by poor decidual and angiogenic reaction  
61 detected in pregnant mice by MRI, as early as at E4.5. These results provide a novel addition to our knowledge  
62 of the ‘embryonic toolbox’ required for successful blastocyst attachment.

63

64

## 65 **Materials and methods**

66 *Animals.* C57Bl/6J female mice (6-12 week old; Envigo, Israel) were mated with Myr-Venus homozygote males.  
67 These hemizygote Myr-Venus embryos were used for histological analysis of hyaluronan metabolism at E4.5.  
68 Impairment of blastocyst activation *in vivo* was conducted as previously described<sup>5</sup>. Briefly, pregnant ICR mice  
69 were intraperitoneally (i.p) administered at E2.5 with tamoxifen citrate (Sigma-Aldrich, Rehovot, Israel) 10 µg  
70 per mouse in a solution containing 12.5% ethanol, 12.5% cremophor EL (Sigma-Aldrich, Rehovot, Israel) and  
71 75% of 5% dextrose, in water, which also served as vehicle. Recombinant mouse LIF (PeproTech, TX, USA) was  
72 administered i.p at a concentration of 10 ug in PBS/mouse at E3.5. Dams were sacrificed at E4.0 prior to dissection  
73 of uterine tissues. Uterine horns were subjected to embryo flushing using PBS, and immediately fixed in PFA 4%  
74 for immunohistochemical analysis. Flushed blastocysts were also fixed in PFA 4% prior to whole-mount  
75 immunofluorescence.

### 76 77 *Design and production of lentivectors*

78 For the purpose of genomic interference with HAS-1 and HAS-2 expression, we have designed specific short  
79 guide RNA oligos (sgRNA) specific for the genomic site of interest (Table S1) The sgRNA sequences were  
80 cloned into lenti CRISPR v2 lentiviral vector, kindly provided by Dr. Igor Ulitsky (Weizmann Institute, Israel)  
81 according to a protocol previously described<sup>17</sup> with slight modifications. Briefly, oligonucleotides for the HAS-  
82 1 or HAS-2 sgRNA guide sequences were phosphorylated using T4 PNK (NEB, Ipswich, MA) for 30  
83 min at 37°C, then annealed by heating to 95°C for 5 minutes and cooled down to 25°C at 5°C/min. The  
84 lenti CRISPR v2 vector and the annealed oligos were then supplemented with FastDigest BsmBI (Thermo Fisher  
85 Fermentas, Waltham, MA) and T7 ligase (NEB, Ipswich, MA) by six cycles of 5 min at 37°C followed by 5 min  
86 at 23°C. The ligation reaction was next treated with PlasmidSafe exonuclease (NEB, Ipswich, MA) for 30 min  
87 at 37°C. Recombinant lentiviruses were produced by transient transfection in HEK293FT cells (Invitrogen, CA,  
88 USA), as described earlier<sup>18</sup>, using 3 envelope and packaging plasmids and one of two viral constructs: (i) Lenti  
89 CRISPR v2 HAS-1 deletion (HAS-1 del), (ii) Lenti CRISPR v2 HAS-2 deletion (HAS-2 del), or (iii) Lenti  
90 CRISPR v2 (Control). Briefly, infectious lentiviruses were harvested at 48 and 72 hours post-transfection, filtered  
91 through 0.45-mm-pore cellulose acetate filters and concentrated by ultracentrifugation at 19400rpm, 15°C for 2.5  
92 hours. Lentiviral supernatant titers were determined by Lenti-X p24 Rapid Titer Kit (supplemental Table 1)  
93 according to manufacturer's protocol (Takara Bio USA, Inc. California, U.S.A).

94  
95 *Mice and lentiviral transduction.* ICR females (8-12 week-old) were mated with vasectomized males and assessed  
96 for the occurrence of vaginal plugs on the following day. Wild-type ICR females (3-4 weeks old) were super-  
97 ovulated by sub-cutaneous injection of pregnant mare's serum gonadotropin (PMSG) (Sigma-Aldrich, Rehovot,

98 Israel) (5 units) followed 48 hours later by i.p injection of human chorionic gonadotropin (hCG) (Sigma-Aldrich,  
99 Rehovot, Israel) (5 units) and then mated with wild-type ICR males. Morulae stage embryos were collected from  
00 the females at E2.5 and then incubated in KSOM medium to obtain expanded blastocysts. Following removal of  
01 the zona pellucida by Tyrode's solution (Sigma-Aldrich, Rehovot, Israel) embryos were incubated with  
02 lentiviruses, in KSOM for 5 hours. The transduced blastocysts implanted into pseudo-pregnant ICR uteri  
03 generated after mating with vasectomized ICR males by non-surgical embryo transfer (NSET, ParaTechs,  
04 Kentucky, US). All mice were maintained under specific pathogen-free conditions and handled under protocols  
05 approved by the Weizmann Institute Animal Care and Use Committee according to international guidelines.

06 *In vitro blastocyst attachment assay.* Blastocyst attachment assay was performed as described previously<sup>19,20</sup>.  
07 Briefly, blastocysts were infected with lentiviruses for five hours, washed and immediately labeled with Vybrant  
08 Cell-Labeling Solution (ThermoFisher Scientific, Waltham, MS) for 20 minutes, before transferring unselectively  
09 to confluent Ishikawa cell monolayers in a 96-well plate coated with Matrigel (Invitro technologies, Victoria,  
10 Australia). Following florescent labeling, a total of three blastocysts was transferred per well. Co-cultures were  
11 incubated undisturbed at 37 °C in a 5% CO<sub>2</sub> atmosphere for 48 hours. The stability of embryo attachment was  
12 measured by repeated aggressive washing and tilting of the culture plates. Attached embryos were detected using  
13 a fluorescent stereo microscope (Nikon, Tokyo, Japan). The ratio of attached embryos per well was defined as a  
14 single observation.

15  
16 *In vivo Dynamic Contrast-Enhanced (DCE) MRI of embryo implantation sites.* DCE MRI experiments were  
17 performed at 9.4 T on a horizontal-bore Biospec spectrometer (Bruker, Karlsruhe, Germany). The pregnant mice  
18 were serially scanned after transgenic embryo transplantation at E4.5. Three-dimensional gradient echo (3D-GE)  
19 imaging of embryo implantation sites was conducted as previously described<sup>7</sup> yielding two parameters that  
20 characterize vascular development and function: (i) fractional Blood Volume (fBV), which describes blood-vessel  
21 density, and (ii) Permeability Surface area product (PS), which represents the rate of contrast agent extravasation  
22 from blood vessels and its accumulation in the interstitial space, Mean fBV and PS were calculated separately for  
23 single implantation sites considering homogeneity of variances between mice.

24 *Immunohistochemistry analysis.* Uterine sections containing embryo implantation sites were fixed in 4%  
25 paraformaldehyde (PFA) and embedded in paraffin. For morphological analysis, tissues were either stained with  
26 hematoxylin and eosin, or underwent immunohistochemical stainings. Blastocysts were fixed in 4% PFA and  
27 underwent immunofluorescence according to standard protocols, with the following primary antibodies: goat anti  
28 HAS-1 (sc-23145; Santa Cruz Biotechnology, Dallas, TX, USA) goat anti HAS-2 (sc-34067; Santa Cruz  
29 Biotechnology), mouse anti TLR-4 (sc-293072; Santa Cruz Biotechnology), goat anti GFP (ab6673; Abcam),

30 rabbit anti CD44 (ab41478; Abcam), rabbit anti RHAMM (ab124729; abcam), rabbit anti LYVE-1 (70R-LR003;  
31 Fitzgerald Industries International, Acton, MA, USA), Rabbit anti osteopontin (NBP1-59190; Novus biologicals,  
32 CO, USA), Rabbit anti VEGF (sc-152; Santa Cruz Biotechnology) and Sheep anti hyaluronan (ab53842, Abcam),  
33 Rabbit anti PTGS-2 (Cayman chemical, Michigan, USA), Rabbit anti Hyal-2 (ab68608, Abcam), Rabbit anti  
34 Hyal-1(ab203293, Abcam). Next, slides were incubated with secondary antibodies, conjugated to biotin against  
35 the appropriate species (except for goat anti GFP in the case of double staining. and incubated with fluorophore  
36 conjugated StreptAvidin (Jackson Immunoresearch Laboratories, PA, USA), Cells undergoing apoptosis were  
37 detected by TUNEL staining (ApopTag; Merck Millipore, MA USA). Slides were counterstained with  
38 hematoxylin and subsequently mounted. All slides were imaged using a fluorescent Olympus SZX-RFL2 zoom  
39 stereo microscope. Flushed blastocysts were fixed with PFA 4% for 20 minutes, washed in PBST 0.1% and  
40 permeabilized by 0.5% Triton-X100 for 15 minutes, prior to their incubation with primary antibodies in PBS  
41 containing 3% bovine serum albumin, overnight at 4C. After washes, the blastocysts were incubated for two hours  
42 with secondary antibodies against appropriate hosts, conjugated to alexa-fluor fluorophores (1:250 dilution in  
43 PBS), counterstained with Hoechst (Invitrogen) and subsequently mounted in paraffin oil. Images were then  
44 acquired using a Zeiss LSM710 confocal microscope and spinning disk 386 confocal microscope (Zeiss,  
45 Oberkochen, Germany) and quantified by FIJI software (<https://imagej.nih.gov/ij/>).

46 *Statistical Analysis.* All statistical analyses performed in this study were two-tailed with a similar level of  
47 significance ( $p=0.05$ ), Tukey Kramer's post-hoc significance test and demonstrated normal values distribution.  
48 On-way ANOVA analysis of variance was conducted for: immunofluorescent detection of hyaluronan production  
49 following tamoxifen and mLIF treatment before implantation (**Figure 3**), Blastocyst attachment assays (**Figure**  
50 **5**) and DCE-MRI of pregnant mice (**Supplementary figure 2 and Figure 7**). All statistical analyses were  
51 conducted using GraphPad Prism 7(CA, USA).

## 52 **Results**

53 During the final stages of pre-implantation development, the blastocyst undergoes lineage differentiation,  
54 generating the polar trophectoderm, adjacent to the ICM, and the mural trophectoderm that attaches to the uterine  
55 epithelium and initiates the invasion to the underlying stroma. Both HAS-1 and HAS-2 are prominently expressed  
56 at E4.5, in the trophectoderm during blastocyst growth and expansion (**Fig. 1a-b**) as well as in the attachment  
57 sites (**Fig. 1c-d**), whereas the expression of Has-3 was hardly detected. This correlates with accumulation of  
58 hyaluronan in the trophectoderm observed during attachment (**Fig. 1e-f& Fig. S1a-b**). The hyaluronan degrading  
59 enzymes. Hyal-1 and Hyal-2, were detected in the luminal epithelium at the attachment sites, with hyal-2 also  
60 observed in the trophectoderm (**Fig. S1c**). Expression of hyaluronan receptor, CD44, was observed in blastocysts  
61 as well as in uterine luminal epithelium, prior to attachment (**Fig. 2a-b**). Nevertheless, another ligand of CD44,  
62 osteopontin was also identified in the trophectoderm of late blastocysts (**Fig. S1f**). Other hyaluronan receptors,

63 such as RHAMM and LYVE-1 (**Fig. 2c-d**) were detected at E4.5 in the luminal epithelium, specifically in  
64 attachment sites, as well as in the sub-epithelial stroma, while TLR-4 was upregulated in the trophectoderm (**Fig.**  
65 **2e-f**). Altogether, we observed the hyaluronan production enzymes in the trophectoderm, alongside its degrading  
66 enzymes as well as the corresponding receptors in the adjacent uterine epithelium.

67 To test whether hyaluronan production by the trophectoderm during blastocyst activation is regulated by estrogen,  
68 the estrogen competitor, tamoxifen, was injected to pregnant mice at E2.5. A decrease in estrogen-regulated  
69 osteopontin expression in the glandular epithelium at E4.0 validated the effect of tamoxifen (**Fig. 3a**). Blastocysts  
70 flushed at E4.0 from tamoxifen treated mice showed a reduced HAS-1 expression in the trophectoderm, resulting  
71 in a corresponding decrease in hyaluronan accumulation on the surface of the trophectoderm. This effect was  
72 reversed by administration of the estrogen downstream effector, LIF at E3.5 (**Fig. 3b-e**). In sum, we revealed  
73 hyaluronan deposition by the trophectoderm to be downstream of the ovarian estrogen nidatory surge, mediated  
74 by uterine secretion of LIF.

75 The role of maternal hyaluronan during implantation was examined by pharmacological suppression of  
76 hyaluronan synthesis, using DON (1 $\mu$ g/g BW; intraperitoneally administered daily to pregnant mice), an effective  
77 inhibitor of glucosamine synthesis<sup>21</sup>. DON-treated mice showed similar number of implantation sites as controls,  
78 PBS-treated mice (**Fig. S2a**), ruling out a role for maternal hyaluronan on this early stage of pregnancy.

79 Abrogation of hyaluronan synthesis targeted to the trophectoderm was achieved by a CRISPR Cas-9 endonuclease  
80 system, using lenti-viral delivery. As expression of Has3 was hardly detected at E4.5 deciduae specific guides  
81 exclusively against Has1 and Has2 were employed (**Fig 4a**). Immunofluorescence of blastocysts, showing  
82 decreased expression strictly in the trophectoderm (**Fig 4b-c**), as well as in implantation sites harvested from  
83 foster dams at E4.5 (**Fig 4d-e**) validated this model. *In vitro* attachment was examined by superimposing these  
84 transgenic blastocysts, previously incubated with a vital dye (**Fig. 5a**), on the surface of uterine epithelial cell  
85 line<sup>20</sup>. Trophectoderm deletion of either Has1 or Has2, and most remarkably of both, reduced blastocyst  
86 attachment *in vitro* (**Fig. 5b**). To examine the role of trophectoderm-synthesized hyaluronan *in vivo*, the transgenic  
87 embryos were transferred to pseudo-pregnant mice, serving as surrogate mothers. The uteri of these mothers were  
88 then flushed at E4.75, a time at which, in ICR (CD1) mice, stable blastocyst attachment should have been  
89 accomplished. Double-deletion of Has1 and Has2 resulted in reduced blastocyst attachment, indicated by an  
90 increased number of embryos successfully flushed out of the uterine lumen (**Fig. 5c**). All in all, targeted deletion  
91 of hyaluronan synthesizing enzymes in the embryo's trophectoderm prevented effective blastocyst attachment.

92 Successful implantation of blastocysts in the control group was visualized by H&E staining of embryo deciduae  
93 harvested from surrogate mothers (**Fig. 6a**). TUNEL assay detected prominent embryonic cell death in the treated  
94 groups, most prominently in embryos with dual deletion of hyaluronan synthesizing enzymes (**Fig. 6b**). The latter  
95 was associated with a decrease in the expression of osteopontin, previously demonstrated to correspond with

96 primary uterine decidualization<sup>22</sup>, at the attachment interface (**Fig. 6c**). To test the key vascular response that  
97 accompanies uterine decidualization in mice, we assessed local uterine vascular function, following blastocyst  
98 attachment of transgenic embryos. For that purpose, we performed DCE MRI of foster dams at E4.5. We found  
99 that the deletion of hyaluronan synthesizing enzymes attenuated angiogenesis and reduced fractional blood  
00 volume (**Fig. 7a-d**). Impaired vascular response was confirmed by examination of histological sections, in which  
01 the distribution of the injected contrast agent biotin-BSA-Gd-DTPA was compromised (**Fig 7e**), alongside a  
02 reduced expression in the attachment interface, of VEGF-A, which serves as a potent decidual pro-angiogenic  
03 factor in response to blastocyst apposition (**Fig 7f**). Aberrant decidual response, as a result of compromised  
04 hyaluronan synthesis, was also demonstrated by decreased PTGS-2 in primary decidualized cells (**Fig. 7g**).

## 06 **Discussion**

07 The goal of this study was to investigate the significance of hyaluronan in blastocyst attachment and successful  
08 gestation. Immunofluorescent analysis of pre-implantation embryos, inhibition of estrogen receptor signaling and  
09 lineage specific genomic interference with hyaluronan synthesis, all demonstrated the essential role of hyaluronan  
10 metabolism within the chain of events preceding embryo implantation. Specifically, our study deciphered the  
11 crucial role of estrogen-regulated trophoctoderm-synthesized hyaluronan for blastocyst attachment,  
12 decidualization and the primary maternal vascular response.

13 Considering the classical role of hyaluronan as a biological glue, its possible role in facilitating attachment of the  
14 pre-implantation embryo has been hypothesized. The expression dynamics of hyaluronan and its receptors and its  
15 accumulation in the uterine-blastocyst interface demonstrated previously by others<sup>5,6,23</sup>, and shown herein by us,  
16 reinforced the notion that this ECM component may indeed mediate blastocyst adhesion. This idea was further  
17 supported by hyaluronan synthesis and subsequent accumulation prior to implantation. Interestingly, multiple key  
18 hyaluronan receptors were detected in the implantation chamber; TLR-4 and CD44 were observed in the  
19 attachment interface, and LYVE-1 and RHAMM were detected in the underlying stroma. Alongside with their  
20 biochemical capacity to bind hyaluronan, these receptors could potentially bind hyaluronan oligosaccharides  
21 generated by locally distributed hyaluronidases, to facilitate trophoblast invasion, when the intact hyaluronan  
22 molecule might interfere<sup>24,25</sup>. The most prominent receptor for hyaluronan, CD44, was detected in the uterine  
23 epithelium at E4.5. Interestingly, CD44 is also a receptor for osteopontin, a secretory product of uterine glandular  
24 epithelium, expressed in response to the acute increase in ovarian estrogen, responsible for blastocyst activation  
25 in mice<sup>5,6</sup>. Osteopontin was also observed in the trophoctoderm of flushed embryos. Therefore, CD44 could also  
26 serve for osteopontin binding. Previous studies reported that depletion of CD44 in the rabbit resulted in impaired  
27 embryo implantation, whereas ablated CD44 in mice did not affect litter size<sup>26</sup>. Furthermore, hyaluronan-CD44

28 interaction, was demonstrated to be employed by the embryo and uterine cells *in vitro*<sup>27</sup>. These conflicting  
29 phenotypes may imply the redundant character of hyaluronan metabolism and receptor binding as previously  
30 demonstrated<sup>12,28</sup>.

31 Secretion of LIF and its downstream target osteopontin by the glandular epithelium is regulated by synchronized  
32 estrogen-estrogen receptor signaling and sequentially obligatory for epithelial receptivity and primary  
33 decidualization via COX-2 activity<sup>5,6,29</sup>. Our study demonstrates that hyaluronan synthesis is also regulated by  
34 estrogen. This conclusion is supported by the effect of the estrogen competitor, tamoxifen<sup>5</sup>, in reducing deposition  
35 of hyaluronan in the trophectoderm associated with decreased HAS-1 expression. Phenotype rescue by pre-  
36 implantation supplementation of LIF further positions hyaluronan synthesis as a downstream target of glandular  
37 epithelial, estrogen-stimulated, LIF secretion, within the chain of events leading to blastocyst activation.  
38 Nevertheless, we cannot rule out a direct regulation of hyaluronan deposition by embryonic estrogen receptor,  
39 expressed by murine mural trophectoderm<sup>30</sup>.

40 The fact that hyaluronan is deposited at the maternal-embryo interface and that this event is subjected to estrogen  
41 regulation may point indeed to its role in implantation. Nevertheless, the origin of the deposited hyaluronan  
42 remained to be identified. It should be noted that at the attachment interface, HAS-1 and HAS-2 are expressed  
43 mainly by the trophectoderm. Nevertheless, we examined the impact of metabolic suppression of maternal  
44 hyaluronan synthesis on embryo implantation. The production of maternal hyaluronan was inhibited by DON,  
45 which prevents the biosynthesis of glucosamine-6-P, an intermediate metabolite in the synthesis of UDP-N-acetyl  
46 glucosamine, a substrate of the three HAS isozymes<sup>31</sup>. The fact that pre-treatment with DON did not alter the  
47 number of implanted embryos implies that uterine hyaluronan is not required for blastocyst attachment. To  
48 provide further support for the embryonic origin of hyaluronan we used mouse transgenic blastocysts, in which  
49 genes encoding for hyaluronan synthesizing enzymes were deleted using lentiviral incorporation to the embryonic  
50 trophectoderm. Embryos, in which hyaluronan synthesis in the trophectoderm was suppressed failed to attach.  
51 The most robust phenotype was observed in embryos in which both hyaluronan synthases were deleted. The latter  
52 also demonstrated decreased osteopontin expression by decidual cells as well as by attached embryos. These  
53 findings are consistent with the increased osteopontin levels observed in endometrial cells next to attached  
54 blastocysts<sup>20</sup>, the identification of osteopontin as a transcriptional target of hyaluronan<sup>32</sup> and trophectoderm  
55 production of osteopontin as a target of ovarian secreted estrogen<sup>33</sup>. The requirement for double-deletion of both  
56 hyaluronan synthases to prominently obtain embryonic mortality, impaired blastocyst attachment and poor  
57 decidual morphology, suggests redundancy of HAS-1 and HAS-2 in hyaluronan metabolism. Defective primary  
58 decidualization was also reflected by decreased PTGS-2 expression by peri-embryo decidualized cells, which is  
59 typically initiated at E4.25 adjacent to the implanting blastocysts, forming the primary decidual zone<sup>9</sup>.  
60 Furthermore, the attenuated vascular response in the absence of embryonic hyaluronan, revealed by functional



61 MRI inspections, accompanied by a reduced trophoctoderm expression of VEGF-A, might result either from weak  
62 blastocyst apposition or decreased PTGS-2 in decidualized stroma, as previously demonstrated post-implantation  
63 in PTGS-2 null mice<sup>34</sup>.

64 In summary, our study demonstrates that hyaluronan production by the trophoctoderm is a synchronized,  
65 hormonally regulated process, indispensable for successful blastocyst attachment and primary decidualization in  
66 mice. The present protocols of *in vitro* fertilization treatments call for single-embryo transfer, thus raising the  
67 need for identification of molecular markers for the selection of the high-quality embryo. Our study suggests that  
68 the capacity for hyaluronan biosynthesis may possibly serve for ranking the attachment capacity of blastocysts.

## 70 **Acknowledgement**

71 This work was supported by the Seventh Framework European Research Council Advanced Grant 232640-  
72 IMAGO and by National Institutes of Health (grant 1R01HD086323-01). Michal Neeman is incumbent of the  
73 Helen and Morris Mauerberger Chair in Biological Sciences.

## 75 **Author contributions**

76 R.H designed research studies, conducted experiments, acquired data, analyzed data, and wrote the manuscript.  
77 E.G designed research studies and conducted experiments. A.C designed research studies and conducted  
78 experiments. M.E conducted experiments. S.B.D designed short-guide RNAs. F.K designed research studies and  
79 reviewed the manuscript. N.D designed research studies and wrote the manuscript. M.N designed research studies  
80 and wrote the manuscript.

81 Corresponding authors: ND and MN.

## 85 **Supplemental Inventory**

86 Supplementary materials

87 Table S1

88 **Figure S1. Hyaluronan production and degradation during implantation.** Related to Figures 1-2.

89 **Figure S2. Pharmacological inhibition of maternal hyaluronan production.**

## 91 **References**

92 1. Rinkenberger JL, Cross JC, Werb Z. Molecular genetics of implantation in the mouse. *Dev Genet.* 1997;21(1):6-20.

- 93 2. Cross JC, Werb Z, Fisher SJ. Implantation and the placenta: key pieces of the development puzzle. *Science*.  
94 1994;266(5190):1508-1518.
- 95 3. Cha J, Sun X, Dey SK. Mechanisms of implantation: strategies for successful pregnancy. *Nat Med*.  
96 2014;18(12):1754-1767.
- 97 4. Cha J, Bartos A, Park C, et al. Appropriate crypt formation in the uterus for embryo homing and implantation  
98 requires Wnt5a-ROR signaling. *Cell Rep*. 2014;8(2):382-392.
- 99 5. Chaen T, Konno T, Egashira M, et al. Estrogen-dependent uterine secretion of osteopontin activates blastocyst  
00 adhesion competence. *PLoS One*. 2012;7(11):e48933.
- 01 6. Aplin JD, Kimber SJ. Trophoblast-uterine interactions at implantation. *Reprod Biol Endocrinol*. 2004;2:48.
- 02 7. Plaks V, Kalchenko V, Dekel N, Neeman M. MRI analysis of angiogenesis during mouse embryo implantation. *Magn  
03 Reson Med*. 2006;55(5):1013-1022.
- 04 8. Kim M, Park HJ, Seol JW, et al. VEGF-A regulated by progesterone governs uterine angiogenesis and vascular  
05 remodelling during pregnancy. *EMBO Mol Med*. 2013;5(9):1415-1430.
- 06 9. Kelleher AM, Milano-Foster J, Behura SK, Spencer TE. Uterine glands coordinate on-time embryo implantation and  
07 impact endometrial decidualization for pregnancy success. *Nat Commun*. 2018;9(1):2435.
- 08 10. Toole BP. Hyaluronan: from extracellular glue to pericellular cue. *Nat Rev Cancer*. 2004;4(7):528-539.
- 09 11. Toole BP. Hyaluronan and its binding proteins, the hyaladherins. *Curr Opin Cell Biol*. 1990;2(5):839-844.
- 10 12. Jiang D, Liang J, Noble PW. Hyaluronan as an immune regulator in human diseases. *Physiol Rev*. 2011;91(1):221-  
11 264.
- 12 13. Sugahara KN, Hirata T, Hayasaka H, Stern R, Murai T, Miyasaka M. Tumor cells enhance their own CD44 cleavage  
13 and motility by generating hyaluronan fragments. *J Biol Chem*. 2006;281(9):5861-5868.
- 14 14. Slevin M, Kumar S, Gaffney J. Angiogenic oligosaccharides of hyaluronan induce multiple signaling pathways  
15 affecting vascular endothelial cell mitogenic and wound healing responses. *J Biol Chem*. 2002;277(43):41046-  
16 41059.
- 17 15. Prevo R, Banerji S, Ferguson DJ, Clasper S, Jackson DG. Mouse LYVE-1 is an endocytic receptor for hyaluronan in  
18 lymphatic endothelium. *J Biol Chem*. 2001;276(22):19420-19430.
- 19 16. Georgiades P, Cox B, Gertsenstein M, Chawengsaksophak K, Rossant J. Trophoblast-specific gene manipulation  
20 using lentivirus-based vectors. *Biotechniques*. 2007;42(3):317-318, 320, 322-315.
- 21 17. Sanjana NE, Shalem O, Zhang F. Improved vectors and genome-wide libraries for CRISPR screening. *Nat Methods*.  
22 2014;11(8):783-784.
- 23 18. Regev L, Neufeld-Cohen A, Tsoory M, et al. Prolonged and site-specific over-expression of corticotropin-releasing  
24 factor reveals differential roles for extended amygdala nuclei in emotional regulation. *Mol Psychiatry*.16(7):714-  
25 728.
- 26 19. Elbaz M, Hadas R, Bilezikjian LM, Gershon E. Uterine Foxl2 regulates the adherence of the Trophectoderm cells to  
27 the endometrial epithelium. *Reprod Biol Endocrinol*. 2018;16(1):12.
- 28 20. Kang YJ, Forbes K, Carver J, Aplin JD. The role of the osteopontin-integrin alphavbeta3 interaction at implantation:  
29 functional analysis using three different in vitro models. *Hum Reprod*. 2014;29(4):739-749.
- 30 21. Tempel C, Gilead A, Neeman M. Hyaluronic acid as an anti-angiogenic shield in the preovulatory rat follicle. *Biol  
31 Reprod*. 2000;63(1):134-140.
- 32 22. Wang XB, Qi QR, Wu KL, Xie QZ. Role of osteopontin in decidualization and pregnancy success. *Reproduction*.  
33 2018;155(5):423-432.
- 34 23. Zhu ZM, Kojima N, Stroud MR, Hakomori S, Fenderson BA. Monoclonal antibody directed to Le(y) oligosaccharide  
35 inhibits implantation in the mouse. *Biol Reprod*. 1995;52(4):903-912.
- 36 24. Brown JJ, Papaioannou VE. Distribution of hyaluronan in the mouse endometrium during the periimplantation  
37 period of pregnancy. *Differentiation*. 1992;52(1):61-68.
- 38 25. Cordo-Russo R, Garcia MG, Barrientos G, et al. Murine abortion is associated with enhanced hyaluronan  
39 expression and abnormal localization at the fetomaternal interface. *Placenta*. 2009;30(1):88-95.
- 40 26. Schmits R, Filmus J, Gerwin N, et al. CD44 regulates hematopoietic progenitor distribution, granuloma formation,  
41 and tumorigenicity. *Blood*. 1997;90(6):2217-2233.
- 42 27. Berneau SC, Ruane PT, Brison DR, Kimber SJ, Westwood M, Aplin JD. Investigating the role of CD44 and  
43 hyaluronate in embryo-epithelial interaction using an in vitro model. *Mol Hum Reprod*. 2019;25(5):265-273.

- 44 28. Rein DT, Roehrig K, Schondorf T, et al. Expression of the hyaluronan receptor RHAMM in endometrial carcinomas suggests a role in tumour progression and metastasis. *J Cancer Res Clin Oncol*. 2003;129(3):161-164.
- 45 29. Vasquez YM, DeMayo FJ. Role of nuclear receptors in blastocyst implantation. *Semin Cell Dev Biol*. 2013;24(10-12):724-735.
- 46 30. Hou Q, Paria BC, Mui C, Dey SK, Gorski J. Immunolocalization of estrogen receptor protein in the mouse blastocyst during normal and delayed implantation. *Proc Natl Acad Sci U S A*. 1996;93(6):2376-2381.
- 47 31. Bates CJ, Adams WR, Handschumacher RE. Control of the formation of uridine diphospho-N-acetyl-hexosamine and glycoprotein synthesis in rat liver. *J Biol Chem*. 1966;241(8):1705-1712.
- 48 32. Kim MS, Park MJ, Moon EJ, et al. Hyaluronic acid induces osteopontin via the phosphatidylinositol 3-kinase/Akt pathway to enhance the motility of human glioma cells. *Cancer Res*. 2005;65(3):686-691.
- 49 33. Xie QZ, Qi QR, Chen YX, Xu WM, Liu Q, Yang J. Uterine micro-environment and estrogen-dependent regulation of osteopontin expression in mouse blastocyst. *Int J Mol Sci*. 2013;14(7):14504-14517.
- 50 34. Matsumoto H, Ma WG, Daikoku T, et al. Cyclooxygenase-2 differentially directs uterine angiogenesis during implantation in mice. *J Biol Chem*. 2002;277(32):29260-29267.

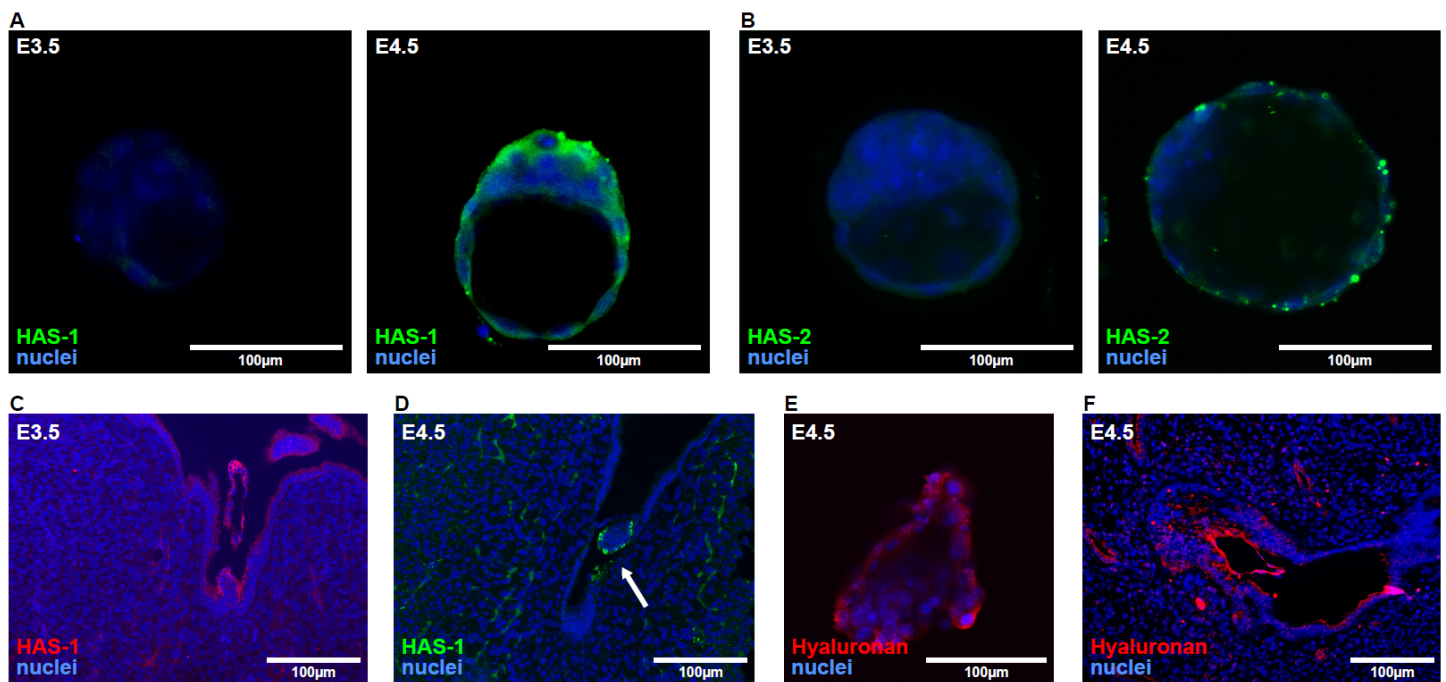

## 62 **Figure 1**

63 **Hyaluronan synthesis and accumulation in the attachment interface.** Female mice were mated with Venus+

64 males, their uterine horns were harvested at E3.5 and E4.5 and immediately flushed. (n=3 dams). (A)

65 Immunofluorescent staining of HAS-1 in blastocysts. (B) Immunofluorescent staining of HAS-2 in blastocysts.

66 (C) Immunohistochemical detection of HAS-1 in histological sections. (D) Immunohistochemical detection of

67 HAS-2 in histological sections; embryo indicated by a white arrow. (E) Immunofluorescent staining of

68 hyaluronan in blastocysts. (F) Immunofluorescent staining of hyaluronan in peri-implantation blastocysts. (E)

69 Immunohistochemical detection of hyaluronan in histological sections.

71

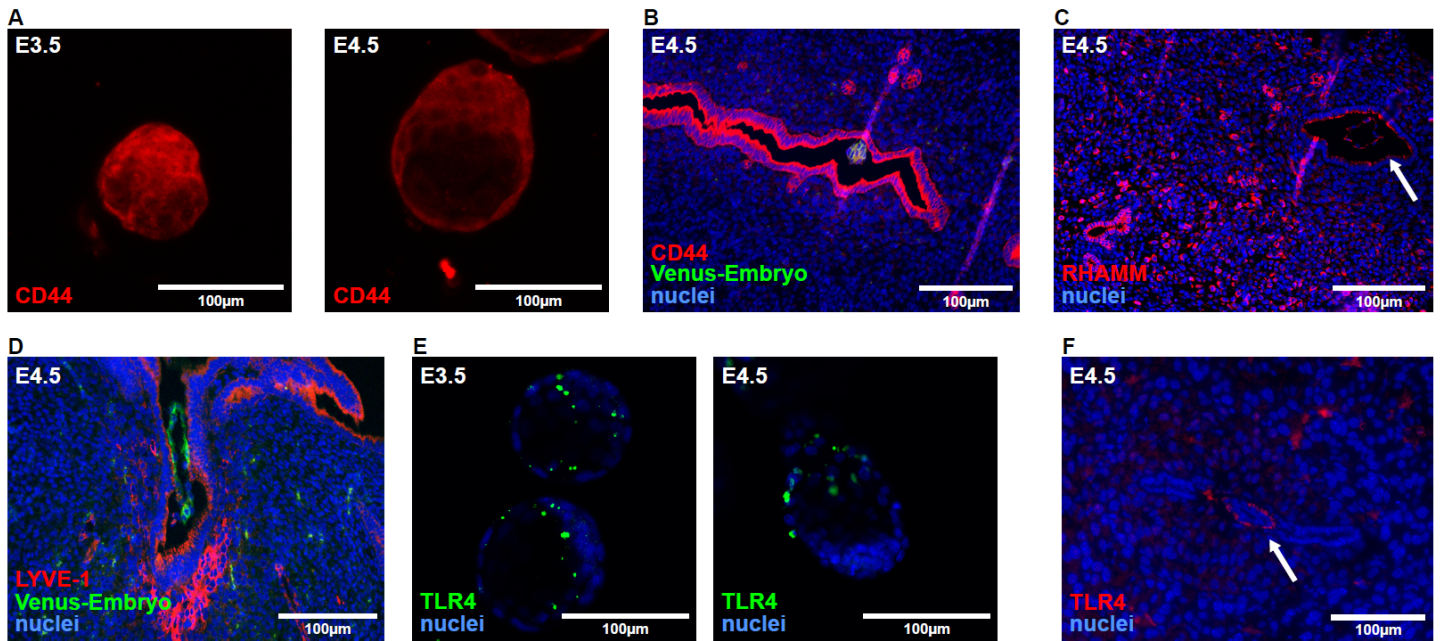

72

73 **Figure 2**

74 **Hyaluronan receptors in the attachment interface.** Female mice were mated with Venus+ males, their uterine  
 75 horns were harvested at E3.5 and E4.5 and immediately flushed. (n=3 dams). (A) Immunofluorescence staining  
 76 of CD44 in blastocysts. (B) Immunohistochemical staining of CD44 in histological sections. (C)  
 77 Immunohistochemical detection of RHAMM in histological sections; embryo is indicated by a white arrow. (D)  
 78 Immunohistochemical detection of LYVE-1 in histological sections. (E) Immunofluorescent staining of TLR-4  
 79 in blastocysts. (F) Immunohistochemical detection of TLR-4 in histological sections; embryo is indicated by a  
 80 white arrow.

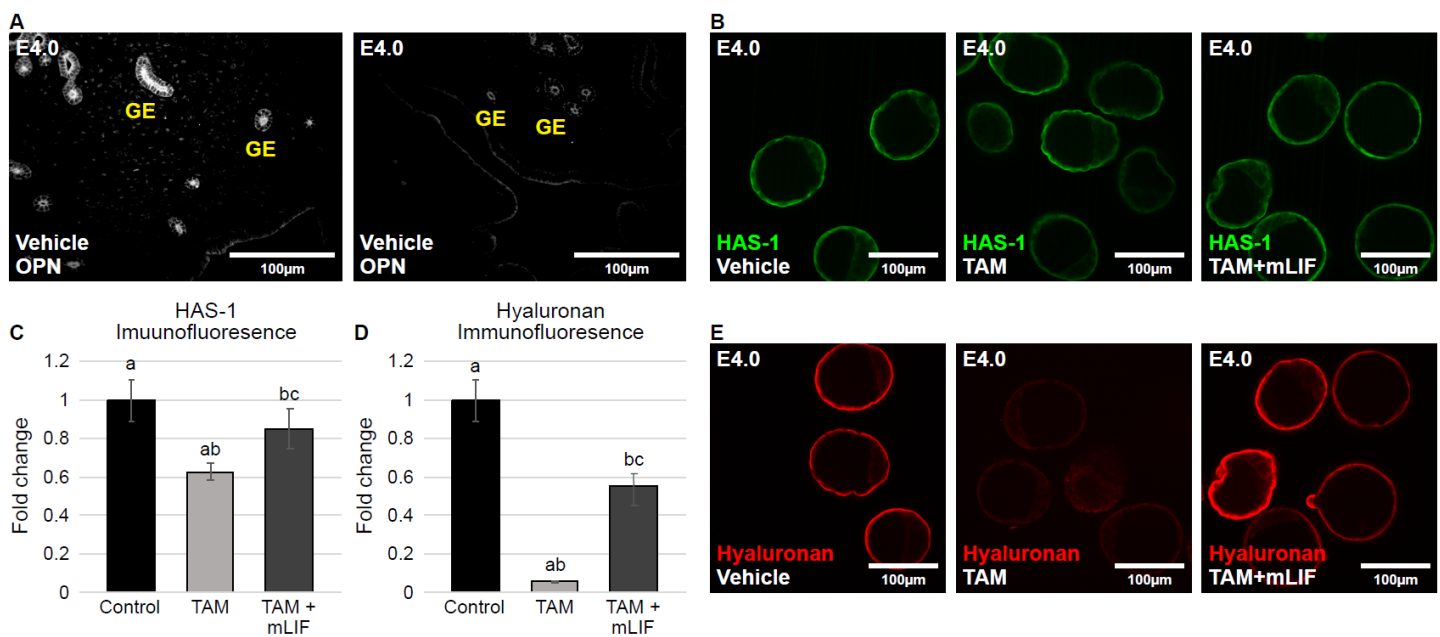

81

82

### 83 Figure 3

84 **Glandular secretion of LIF-regulated estrogen, triggers hyaluronan synthesis in the trophectoderm.** ICR  
85 female mice mated with ICR males, were administered with tamoxifen at E2.5, followed by recombinant mouse  
86 LIF; their uterine horns were harvested at E4.0 and immediately flushed (n=3 dams). (A) Model validation by  
87 immunohistochemistry of osteopontin (OPN) in E4.0 uteri following tamoxifen (TAM) treatment; GE indicates  
88 glandular epithelium. (B) Immunofluorescent staining of HAS-1 in blastocysts following tamoxifen treatment  
89 and recombinant mouse LIF (mLIF). (C-D) Image analysis of HAS-1 and hyaluronan in the trophectoderm  
90 following tamoxifen treatment and mouse LIF repletion; Letters indicate statistically significant differences  
91 ( $\pm 0.108$ ; 0.041; 0.105) (n=3 dams, 8 embryos in Vehicle group, 19 embryos in TAM, 9 embryos in mLIF);  
92 ( $\pm 0.109$ ; 0.005; 0.07) (n=3 dams, 8 embryos in Vehicle group, 19 embryos in TAM, 9 embryos in mLIF);. (E)  
93 Immunofluorescent staining of hyaluronan in blastocysts following tamoxifen treatment and mLIF injection.

94

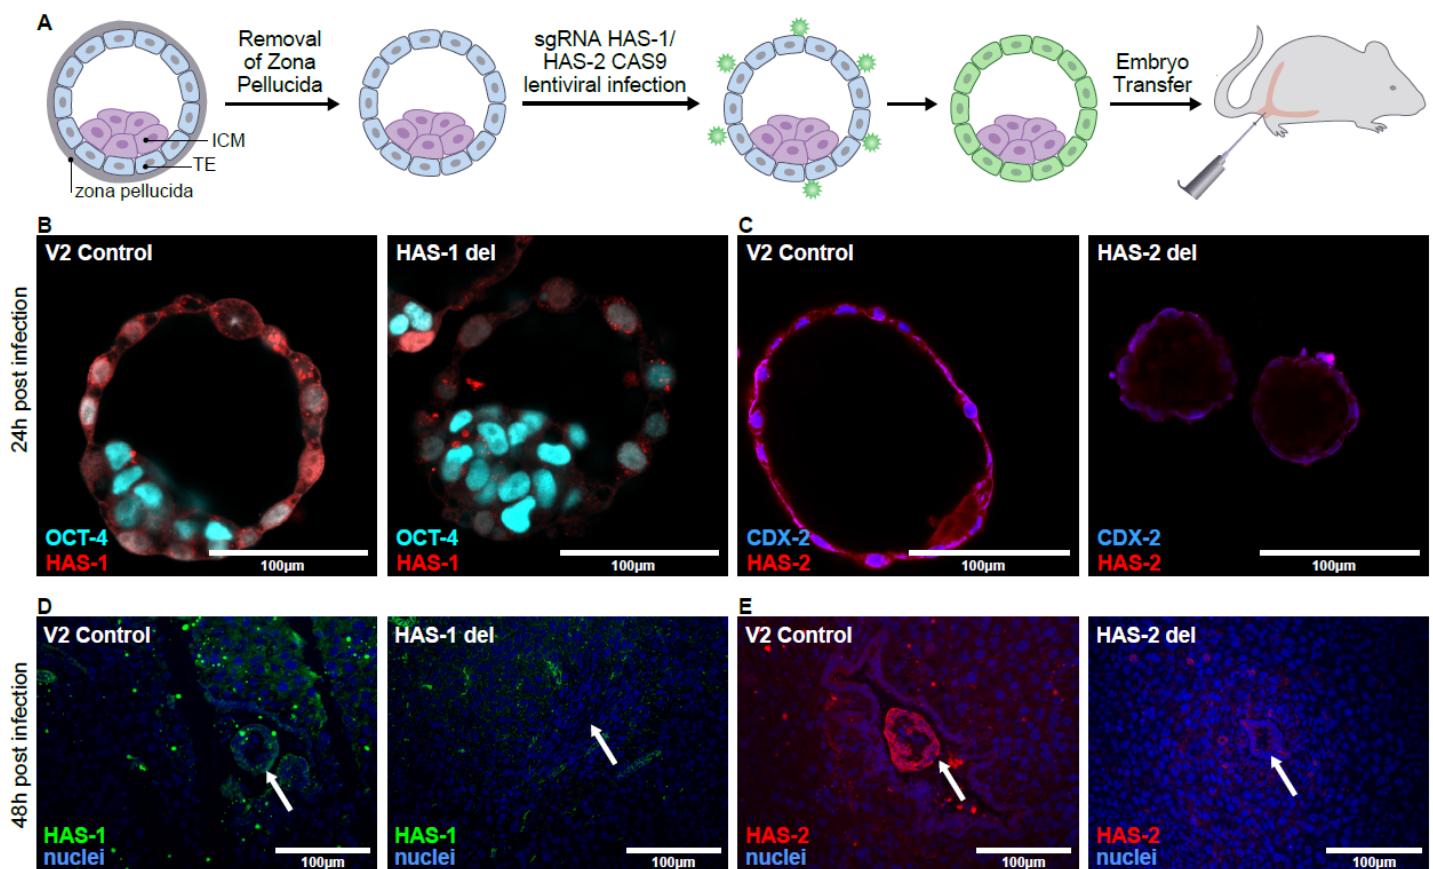

95

### 96 Figure 4

97 **Hyaluronan depletion in the trophectoderm by CRISPR implementation using lenti-viral infection.** Pre-  
98 implantation embryos flushed from ICR female mice subjected to lenti-viral infection of the trophectoderm was  
99 followed by embryo transfer to pseudo-pregnant mice. (A) Illustration of CRISPR-mediated interference with

00 peri-implantation trophectoderm synthesis of hyaluronan. (B) Immunofluorescent staining of HAS-1 and Oct-4<sup>+</sup>  
01 ICM cells in blastocysts grown in culture for 24 hours after viral infection. (C) Immunofluorescent staining of  
02 HAS-2 and CDX-2<sup>+</sup> trophectoderm in blastocysts grown in culture for 24 hours after viral infection. (D-E)  
03 Immunohistochemical detection of HAS-1 and HAS-2 in E4.5 deciduae of foster dams.

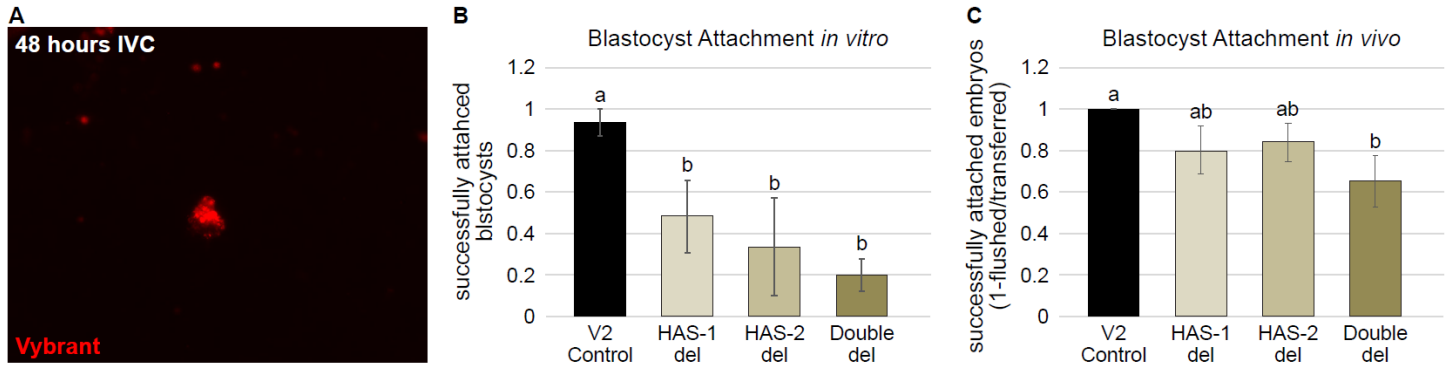

## 07 Figure 5

08 **Trophectoderm production of hyaluronan is essential for blastocyst attachment.** Pre-implantation embryos,  
09 subjected to lenti-viral infection of the trophectoderm, were flushed from ICR Female mice. These embryos were  
10 either cultured *in vitro* (IVC) with an endometrial carcinoma cell line, or transferred to pseudo-pregnant mice.  
11 (A) Longitudinal detection of blastocysts during IVC was achieved by their labeling with Vybrant Cell-Labeling  
12 Solution. (B) Quantification of the *in vitro* attachment assay, at 48 hours; letters indicate statistically significant  
13 differences ( $\pm 0.066$ ; 0.175; 0.235; 0.081) (n=15 embryos per group). (C) Quantification of *in vivo* attachment  
14 assay conducted in foster dams at E4.75; letters indicate statistically significant differences ( $\pm 0$ ; 0.1154; 0.092;  
15 0.125) (n=5 dams in Control, 4 dams in HAS-1 del, 5 dams in HAS-2 del, 4 dams in Double del).

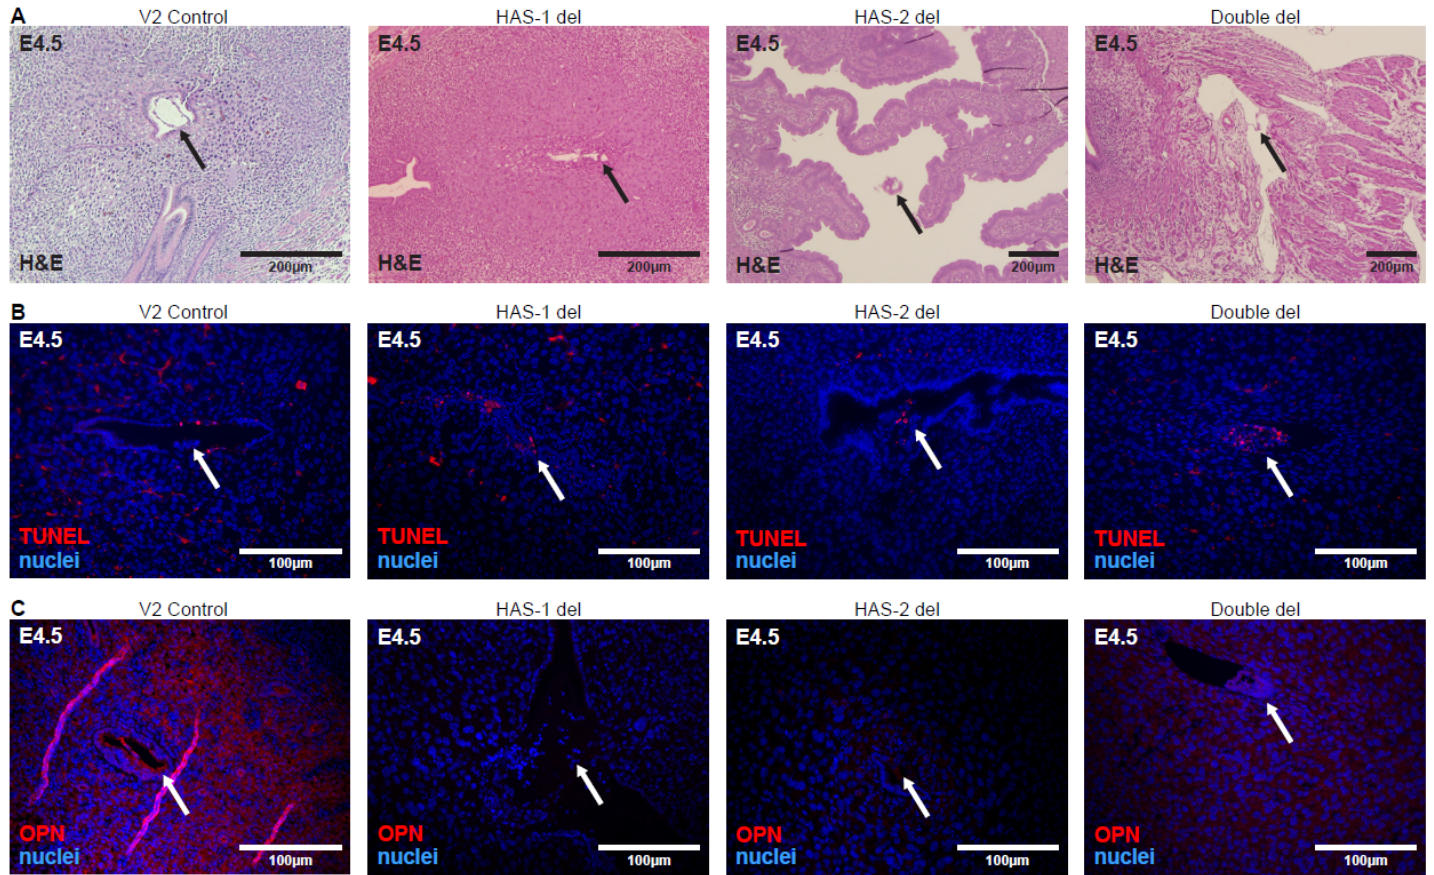

16  
17 **Figure 6**

18 **Hyaluronan depleted blastocysts fail to implant.** Deciduae were harvested from foster dams of all groups at  
19 E4.5, immediately fixed and subjected to histological analysis. (A) H&E staining of embryo implantation sites;  
20 black arrows indicate blastocysts. (B) TUNEL analysis of E4.5 deciduae; white arrows indicate embryos. (C)  
21 Immunohistochemical detection of osteopontin (OPN) in E4.5 deciduae.

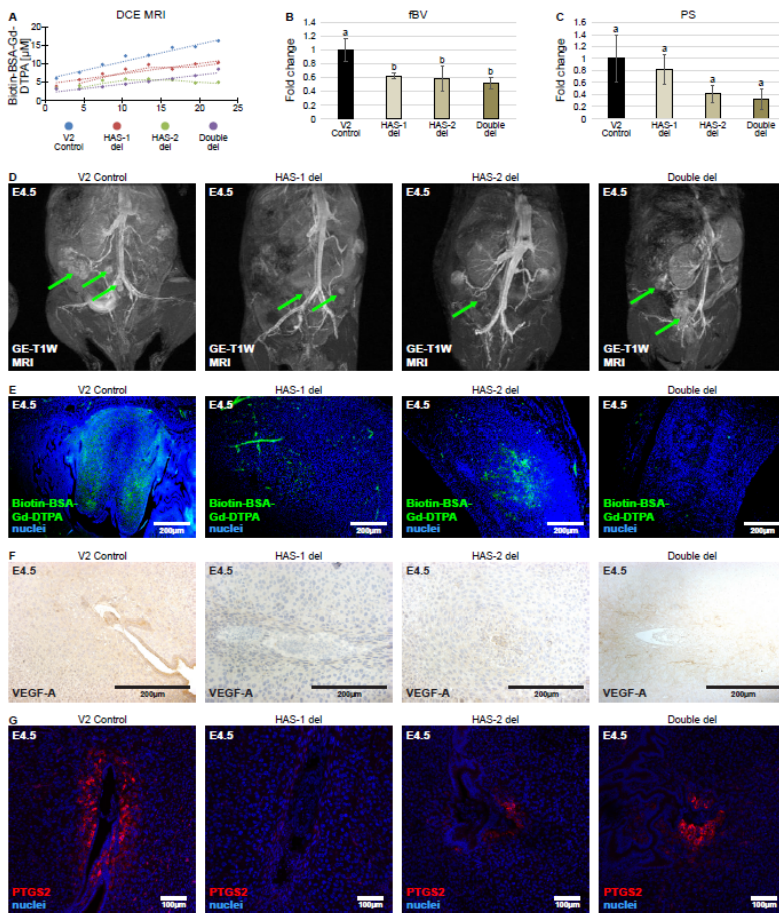

## Figure 7

**Trophectoderm synthesized hyaluronan regulates the primary decidual response.** Foster dams of all groups were subjected to DCE MRI at E4.5; their deciduae were harvested, fixed and subjected to histological analysis. (A) Linear regression plots generated by DCE MRI analysis of all four groups; letters indicate statistically significant differences. Two functional vascular parameters produced from DCE MRI analysis. (B) Fractional blood volume (fBV); ( $\pm 0.199$ ;  $0.039$ ;  $0.184$ ;  $0.093$ ) ( $n=8$  deciduae in Control,  $8$  deciduae in HAS-1 del,  $5$  deciduae in HAS-2 del,  $5$  deciduae in Double del), (C) and permeability surface area (PS) respectively; letters indicate statistically significant differences ( $\pm 0.384$ ;  $0.24$ ;  $0.14$ ;  $0.171$ ) ( $n=8$  deciduae in control,  $8$  deciduae in HAS-1 del,  $5$  deciduae in HAS-2 del,  $5$  deciduae in Double del). (D) Representative maximum intensity projection images of foster dams acquired during T1-weighted MRI. (E) *Ex-vivo* detection of intravenously administered MRI contrast agent, 30 minutes after injection of E4.5 deciduae; white arrows indicate embryos. (F) Immunohistochemical analysis of VEGF-A in implantation sites. (G) Immunohistochemical analysis of PTGS-2 in implantation sites.



40

41 **Supplementary material**

42 **Table S1.** Viral titers measured for lentiviral vectors

| Insert    | Vector                         | Viral titer (IFU/ml) |
|-----------|--------------------------------|----------------------|
| Control   | Lenti CRISPR v2                | $\geq 1 \times 10^7$ |
| HAS-1 del | Lenti CRISPR v2 HAS-1 deletion | $\geq 1 \times 10^7$ |
| HAS-2 del | Lenti CRISPR v2 HAS-2 deletion | $\geq 1 \times 10^7$ |

43

44 **Supplemental Figures**

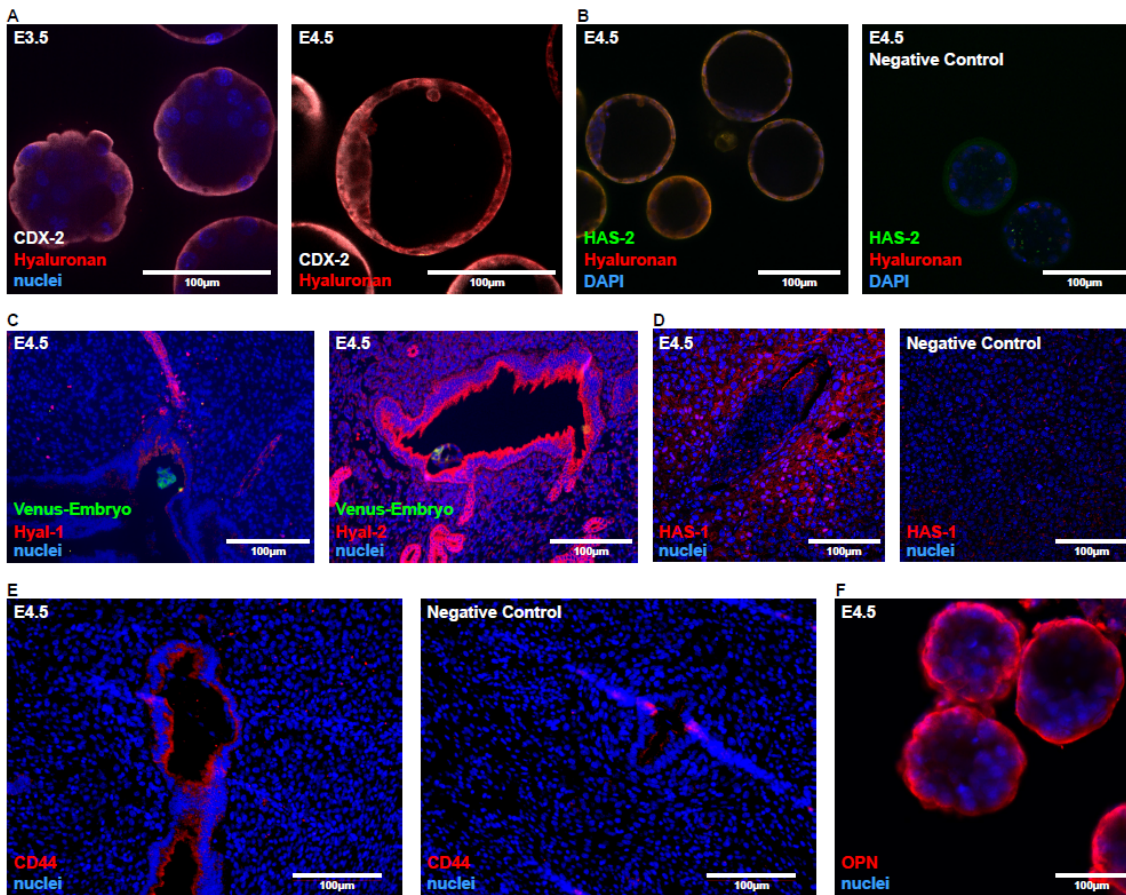

45

46

47

## 48 **Supplementary Figure 1**

49 **Hyaluronan production and degradation during implantation.** Female mice were mated with Venus+ males,  
50 their uterine horns were harvested at E3.5 and E4.5 and wither immediately flushed or subjected to  
51 immunohostichemical analysis. (n=3 dams). (A) Immunofluorescent staining of Hyaluronan in CDX-2<sup>+</sup>  
52 trophectoderm in blastocysts. (B) Immunofluorescent staining of hyaluronan and HAS-2 in blastocysts; Negative  
53 control was performed by excluding the primary antibody. (C) Immunohistochemical detection of Hyal-1 and  
54 Hyal-2 in histological sections. (D) Immunohistochemical detection of HAS-1 in histological sections at E6.5;  
55 Negative control was performed by excluding the primary antibody. (E) Immunohistochemical detection of CD44  
56 in histological sections; Negative control was performed by excluding the primary antibody. (F)  
57 Immunofluorescent staining of osteopontin in pre-implantation blastocysts.

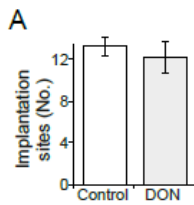

## 59 **Supplementary Figure 2**

60 **Pharmacological inhibition of maternal hyaluronan production.** Pregnant ICR mice were administered with DON  
61 (1µg/g BW) daily at E3.5-E5.5 (A) Similar number of embryo implantation sites was observed both, for the  
62 control as well as for DON treated mice (13.14±0.82; 12.11±1.5) (n=9 dams in the control; 13 dams in DON-  
63 treated mice). (B) Surface area quantification of implantation sites (2.619 fold change±0.056; 0.037) (n=3 dams,  
64 16 implantation sites in the control; 6 dams, 17 implantation sites in DON).
